# Supplementary material for: Dinuclear Lanthanide(III) Complexes from the Use of Methyl 2-Pyridyl Ketoxime: Synthetic, Structural, and Physical Studies
Source: PubMed Central journal article supplement (PMC7999197; doi:10.3390/molecules26061622), 2021-03-15
Supplement: molecules-26-01622-s001.pdf [file molecules-26-01622-s001.pdf]

Supplementary Materials

# Dinuclear Lanthanide(III) Complexes from the Use of Methyl 2-pyridyl Ketoxime: Synthetic, Structural and Physical Studies

Christina D. Polyzou <sup>1</sup>, Helen Nikolaou <sup>1</sup>, Catherine P. Raptopoulou <sup>2</sup>, Konstantis F. Konidaris <sup>3</sup>, Vlasoula Bekiari <sup>4,\*</sup>, Vassilis Psycharis <sup>2,\*</sup> and Spyros P. Perlepes <sup>1,5,\*</sup>

<sup>1</sup> Department of Chemistry, University of Patras, 26504 Patras, Greece; christipoche@gmail.com (C.D.P.); eleni.nikolaou-2@postgrad.manchester.ac.uk (H.N.)

<sup>2</sup> Institute of Nanoscience and Nanotechnology, NCSR “Demokritos”, 15310 Aghia Paraskevi Attikis, Greece; c.raptopoulou@inn.demokritos.gr (C.P.R.)

<sup>3</sup> Department of Pharmacy, University of Patras, 26504 Patras, Greece; konidaris@upatras (K.F.K.)

<sup>4</sup> Department of Crop Science, University of Patras, 30200 Messolonghi, Greece; bbekiari@upatras.gr (V.B.)

<sup>5</sup> Foundation for Research and Technology – Hellas (FORTH), Institute of Chemical Engineering Sciences (ICE – HT), Platani, B.O. Box 1414, 26504 Patras, Greece

\* Correspondence: bbekiari@upatras.gr (V.B.); v.psycharis@inn.demokritos.gr (V.P.); perlepes@patreas.upatras.gr (S.P.P.); Tel: +30-26130-58240 (V.B.); +30-210-6503346 (V.P.); +30-2610-996730 (S.P.P.)

Table S1. Crystallographic data and structural refinement parameters for complexes 1, 5 and 6.

| Parameter                                                                                                               | 1                                                                              | 5                                                                              | 6                                                                              |
|-------------------------------------------------------------------------------------------------------------------------|--------------------------------------------------------------------------------|--------------------------------------------------------------------------------|--------------------------------------------------------------------------------|
| Formula                                                                                                                 | C <sub>22</sub> H <sub>28</sub> N <sub>6</sub> Nd <sub>2</sub> O <sub>16</sub> | C <sub>22</sub> H <sub>28</sub> N <sub>6</sub> Dy <sub>2</sub> O <sub>16</sub> | C <sub>26</sub> H <sub>34</sub> Dy <sub>2</sub> N <sub>4</sub> O <sub>14</sub> |
| Formula weight                                                                                                          | 920.98                                                                         | 957.50                                                                         | 951.57                                                                         |
| Crystal color                                                                                                           | colorless                                                                      | colorless                                                                      | colorless                                                                      |
| Crystal size, mm                                                                                                        | 0.30 x 0.09 x 0.08                                                             | 0.18 x 0.16 x 0.10                                                             | 0.15 x 0.13 x 0.10                                                             |
| Crystal system                                                                                                          | triclinic                                                                      | triclinic                                                                      | monoclinic                                                                     |
| Space group                                                                                                             | <i>P</i> $\bar{1}$                                                             | <i>P</i> $\bar{1}$                                                             | <i>P</i> 2 <sub>1</sub> / <i>c</i>                                             |
| Temperature, K                                                                                                          | 160                                                                            | 160                                                                            | 160                                                                            |
| Radiation, Å                                                                                                            | Cu K $\alpha$ , 1.54178                                                        | Cu K $\alpha$ , 1.54178                                                        | Cu K $\alpha$ , 1.54178                                                        |
| <i>a</i> , Å                                                                                                            | 8.1064(2)                                                                      | 8.0902(5)                                                                      | 8.7141(1)                                                                      |
| <i>b</i> , Å                                                                                                            | 8.3855(2)                                                                      | 8.3503(3)                                                                      | 12.9093(2)                                                                     |
| <i>c</i> , Å                                                                                                            | 12.0672(2)                                                                     | 11.8921(6)                                                                     | 15.3750(2)                                                                     |
| $\alpha$ , °                                                                                                            | 98.087(1)                                                                      | 98.748(1)                                                                      | 90.0(1)                                                                        |
| $\beta$ , °                                                                                                             | 99.681(1)                                                                      | 100.335(1)                                                                     | 107.586(1)                                                                     |
| $\gamma$ , °                                                                                                            | 99.893(1)                                                                      | 99.857(1)                                                                      | 90.0(1)                                                                        |
| Volume, Å <sup>3</sup>                                                                                                  | 784.34(3)                                                                      | 764.70(7)                                                                      | 1648.75(4)                                                                     |
| <i>Z</i>                                                                                                                | 1                                                                              | 1                                                                              | 2                                                                              |
| Calculated density, g cm <sup>-3</sup>                                                                                  | 1.950                                                                          | 2.079                                                                          | 1.917                                                                          |
| Absorption coefficient, mm <sup>-1</sup>                                                                                | 25.69                                                                          | 26.59                                                                          | 24.59                                                                          |
| $\theta_{\min}$ - $\theta_{\max}$ , °                                                                                   | 7.0-65.0                                                                       | 7.0-65.0                                                                       | 6.7-65.0                                                                       |
| Reflections collected/unique ( <i>R</i> <sub>int</sub> )                                                                | 12135/2445 (0.078)                                                             | 8564/2350 (0.113)                                                              | 21531/2879 (0.076)                                                             |
| Reflections with <i>I</i> > 2 $\sigma$ ( <i>I</i> )                                                                     | 2374                                                                           | 1796                                                                           | 2601                                                                           |
| Refined parameters/restraints                                                                                           | 212/0                                                                          | 212/0                                                                          | 212/0                                                                          |
| <i>R</i> <sub>1</sub> <sup>a</sup> [ <i>I</i> > 2 $\sigma$ ( <i>I</i> )], <i>R</i> <sub>1</sub> <sup>a</sup> (all data) | 0.0462, 0.0469                                                                 | 0.0875, 0.0996                                                                 | 0.0523, 0.0552                                                                 |
| <i>wR</i> <sub>2</sub> <sup>b</sup> [ <i>I</i> > 2 $\sigma$ ( <i>I</i> )], <i>wR</i> <sub>2</sub> (all data)            | 0.1158, 0.1170                                                                 | 0.1728, 0.1895                                                                 | 0.1324, 0.1351                                                                 |
| Goodness-of-fit on <i>F</i> <sup>2</sup>                                                                                | 1.03                                                                           | 1.15                                                                           | 1.06                                                                           |
| Largest differences peak and hole (e Å <sup>-3</sup> )                                                                  | 2.12/-2.07                                                                     | 2.46/-1.72                                                                     | 1.64/-2.41                                                                     |

<sup>a</sup>  $R_1 = \sum(|F_o| - |F_c|) / \sum(|F_o|)$ . <sup>b</sup>  $wR_2 = \{\sum[w(F_o^2 - F_c^2)^2] / \sum[w(F_o^2)^2]\}^{1/2}$ ,  $w = 1/[\sigma^2(F_o^2) + (aP)^2 + bP]$ , where  $P = [\max(F_o^2, 0) + 2F_c^2]/3$  ( $a = 0.0782$  and  $b = 0.9824$  for **1**;  $a = 0.0713$  and  $b = 0.03264$  for **5**;  $a = 0.724$  and  $b = 10.8106$  for **6**).

**Table S2.** Continuous Shape Measures (CShM) values<sup>a</sup> for the potential coordination polyhedra of the crystallographically independent Ln<sup>III</sup> centers in the structures of complexes **1**, **5** and **6**.

| Ideal Coordination Polyhedron                | <b>1</b>     | <b>5</b>     | <b>6</b>     |
|----------------------------------------------|--------------|--------------|--------------|
| Enneagon (EP-9)                              | 34.398       | 34.902       | 34.011       |
| Octagonal pyramid (OPY-9)                    | 21.909       | 22.085       | 22.489       |
| Heptagonal bipyramid (HBPY-9)                | 17.795       | 17.915       | 17.333       |
| Johnson triangular cupola (JTC-9)            | 15.576       | 15.552       | 14.592       |
| Capped cube (JCCU-9)                         | 11.176       | 10.707       | 9.358        |
| Spherical-relaxed capped cube (CCU-9)        | 9.344        | 9.544        | 8.647        |
| Capped square antiprism (JCSAPR-9)           | 2.865        | 2.219        | 2.620        |
| Spherical-capped square antiprism (CSAPR-9)  | 2.110        | 1.598        | 1.992        |
| Tricapped trigonal prism (JTCTPR-9)          | 3.584        | 3.190        | 3.117        |
| Spherical tricapped trigonal prism (TCTPR-9) | 2.754        | 2.405        | 2.517        |
| Tridiminished icosahedron (JTDIC-9)          | 13.286       | 13.267       | 12.424       |
| Hula-hoop (HH-9)                             | 9.232        | 9.620        | 9.902        |
| Muffin (MFF-9)                               | <b>1.664</b> | <b>1.316</b> | <b>1.578</b> |

<sup>a</sup>The polyhedron with the smallest CShM value (in bold) is the real coordination polyhedron of the Ln/Ln1' center for the complex.

**Table S3.** Intra- and intermolecular H-bonding interactions (distances in Å and angles in °) in the crystal structures of the isomorphous complexes **1** and **5**. <sup>a,b</sup>

| D-H...A                                     | D-H  | H...A | D...A     | D-H...A |
|---------------------------------------------|------|-------|-----------|---------|
| Complex <b>1</b>                            |      |       |           |         |
| O1-H(O1)...O5                               | 0.84 | 2.01  | 2.734(7)  | 145     |
| C7-H(C7)...O6'                              | 0.95 | 2.57  | 3.261(8)  | 129     |
| C4-H(C4)...O7 <sup>i</sup>                  | 0.95 | 2.49  | 3.376(9)  | 155     |
| C9-H <sub>B</sub> (C9)...O4 <sup>ii</sup>   | 0.98 | 2.43  | 3.383(11) | 164     |
| C11-H <sub>B</sub> (C11)...O2 <sup>ii</sup> | 0.98 | 2.60  | 3.469(11) | 149     |
| C1-H <sub>A</sub> (C1)...O1''               | 0.98 | 2.52  | 3.392(9)  | 148     |
| C1-H <sub>B</sub> (C1)...O4'''              | 0.98 | 2.47  | 3.319(9)  | 145     |
| Complex <b>5</b>                            |      |       |           |         |
| O1-H(O1)...O5                               | 0.84 | 2.02  | 2.690(12) | 136     |
| C7-H(C7)...O6'                              | 0.95 | 2.44  | 3.107(14) | 127     |
| C4-H(C4)...O7 <sup>i</sup>                  | 0.95 | 2.51  | 3.391(17) | 155     |
| C9-H <sub>B</sub> (C9)...O4 <sup>ii</sup>   | 0.98 | 2.42  | 3.348(15) | 157     |

|                                             |      |      |           |     |
|---------------------------------------------|------|------|-----------|-----|
| C11-H <sub>B</sub> (C11)···O2 <sup>ii</sup> | 0.98 | 2.56 | 3.434(18) | 148 |
| C1-H <sub>A</sub> (C1)···O1 <sup>''</sup>   | 0.98 | 2.55 | 3.402(15) | 146 |
| C1-H <sub>B</sub> (C1)···O4 <sup>'''</sup>  | 0.98 | 2.59 | 3.35(2)   | 134 |

<sup>a</sup> D = donor, A = acceptor. <sup>b</sup> Symmetry codes: (') = -x+2, -y+1, -z+2; (') = -x+1, -y+1, -z+1; (''') = -x+1, -y, -z+1; (i) = -x+2, -y+1, -z+1; (ii) = x, y+1, z.

**Table S4.** Intra- and intermolecular H-bonding interactions (distances in Å and angles in °) in the crystal structure of **6**. <sup>a,b</sup>

| D-H···A                                     | D-H  | H···A | D···A     | D-H···A |
|---------------------------------------------|------|-------|-----------|---------|
| O1-H(O1)···O6'                              | 0.84 | 2.03  | 2.603(8)  | 125     |
| C7-H(C7)···O5                               | 0.95 | 2.52  | 3.185(12) | 127     |
| C16-H <sub>C</sub> (C16)···O2 <sup>ii</sup> | 0.98 | 2.46  | 3.412(9)  | 164     |
| C4-H(C4)···O3 <sup>''</sup>                 | 0.95 | 2.35  | 3.114(11) | 137     |
| C6-H(C6)···O2 <sup>'''</sup>                | 0.95 | 2.44  | 3.200(10) | 137     |
| C14-H <sub>C</sub> (C14)···O7 <sup>i</sup>  | 0.98 | 2.58  | 3.521(9)  | 162     |

<sup>a</sup> D = donor, A = acceptor. <sup>b</sup> Symmetry codes: (') = -x, -y, -z; (') = -x+1, y+1/2, -z+1/2; (''') = x+1, y, z; (i) = -x+1, -y, -z; (ii) = x, -y+1/2, z-1/2.

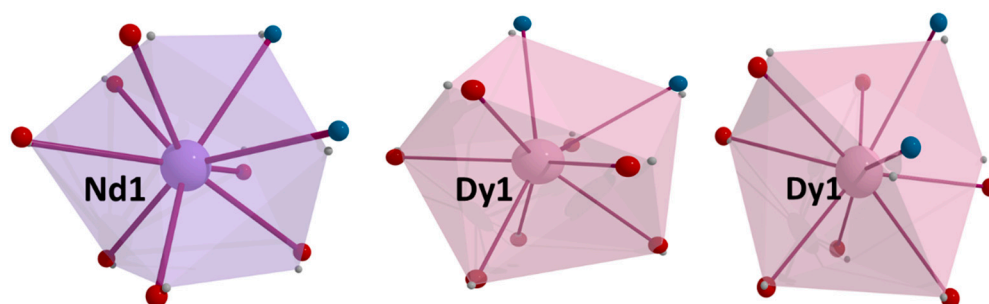

**Figure S1.** The muffin-type coordination polyhedra of Ln1/Ln1' in complexes **1** (left), **5** (middle) and **6** (right). The plotted polyhedra with the small spheres as vertices are the best-fit polyhedra created by using the program SHAPE.

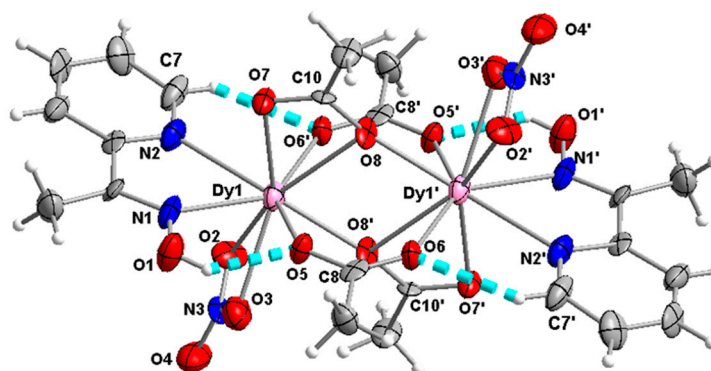

(a)

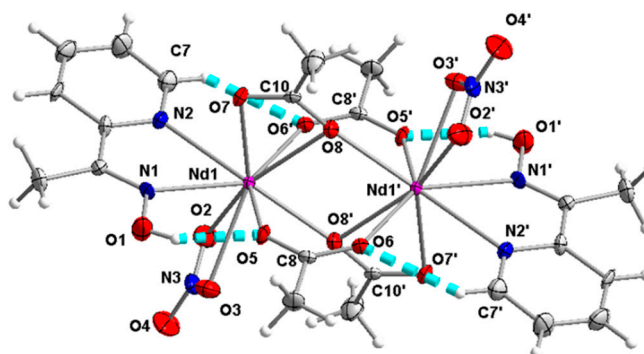

(b)

**Figure S2.** Intramolecular H bonds (dashed cyan lines) in the dinuclear complexes  $[\text{Dy}_2(\text{O}_2\text{CMe})_4(\text{NO}_3)_2(\text{mepaoH})_2]$  (**5**, a) and  $[\text{Nd}_2(\text{O}_2\text{CMe})_4(\text{NO}_3)_2(\text{mepaoH})_2]$  (**1**, b). The ellipsoids are drawn at the 50% thermal probability level. Symmetry code: (') =  $-x+2, -y+1, -z+2$ .

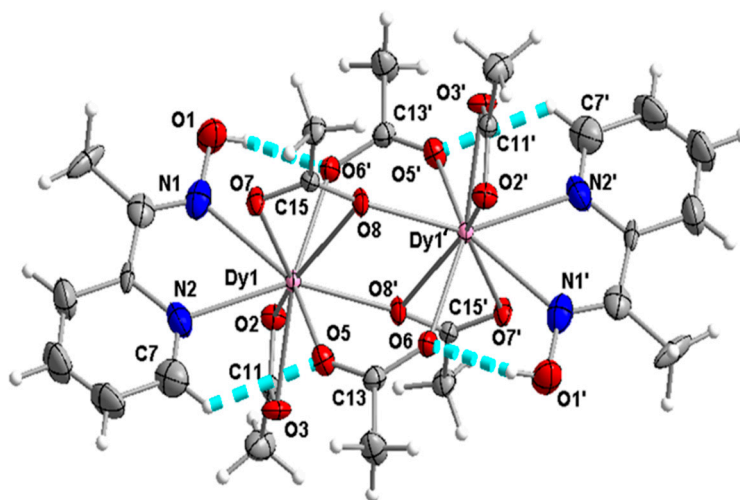

**Figure S3.** Intramolecular H bonds (dashed cyan lines) in the dinuclear complex  $[\text{Dy}_2(\text{O}_2\text{CMe})_6(\text{mepaoH})_2]$  (**6**). The ellipsoids are drawn at the 50% thermal probability level. Symmetry code: (') =  $-x, -y, -z$ .
